# Supplementary material for: Effect of Inhaled Cannabis for Pain in Adults With Sickle Cell Disease: A Randomized Clinical Trial
Source: PubMed Central journal article supplement (PMC7368173; doi:10.1001/jamanetworkopen.2020.10874), 2020-07-17
Supplement: jamanetwopen-3-e2010874-s002.pdf [file jamanetwopen-3-e2010874-s002.pdf]

## Supplementary Online Content

Abrams DI, Couey P, Dixit N, et al. Effect of inhaled cannabis for pain in adults with sickle cell disease: a randomized clinical trial. *JAMA Netw Open*. 2020;3(7):e2010874.  
doi:10.1001/jamanetworkopen.2020.10874

### **eFigure.** Forest Plot

This supplementary material has been provided by the authors to give readers additional information about their work.

**eFigure.** Forest Plot

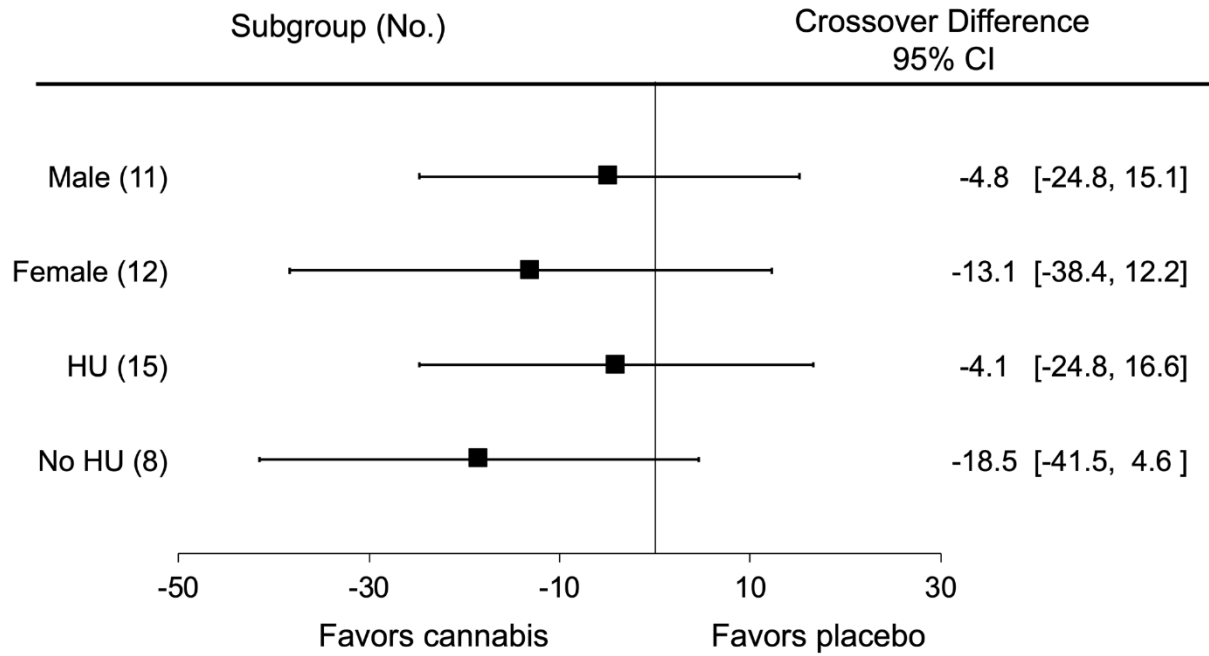

The within patient difference in pain rating between cannabis and placebo treatment, referred to as the crossover difference, was averaged over all five days of treatment. The average crossover difference and 95% confidence interval are shown by gender and hydroxyurea use. A negative crossover difference favors cannabis treatment, while a positive crossover difference favors placebo treatment.
