# Supplementary material for: Effect of Inhaled Cannabis for Pain in Adults With Sickle Cell Disease: A Randomized Clinical Trial
Source: PubMed Central journal article supplement (PMC7368173; doi:10.1001/jamanetworkopen.2020.10874), 2020-07-17
Supplement: jamanetwopen-3-e2010874-s003.pdf [file jamanetwopen-3-e2010874-s003.pdf]

## Data Sharing Statement

Abrams. Effect of Inhaled Cannabis for Pain in Adults With Sickle Cell Disease. *JAMA Netw Open*. Published July 17, 2020.  
10.1001/jamanetworkopen.2020.10874

### Data

**Data available:** Yes

**Data types:** Deidentified participant data

**How to access data:** John Connett [john-c@ccbr.umn.edu](mailto:john-c@ccbr.umn.edu)

**When available:** With publication

### Supporting Documents

**Document types:** Informed consent form

**How to access documents:** [Paul.Couey@ucsf.edu](mailto:Paul.Couey@ucsf.edu)

**When available:** With publication

### Additional Information

**Who can access the data:** Researchers whose proposed use of data has been approved

**Types of analyses:** For approved purposes

**Mechanisms of data availability:** After approval of a proposal

**Any additional restrictions:** None
